# Supplementary material
Source: Springer Nature journal article supplement (https://www.springermedizin.de/resource/supplementary/12967_2011_843_MOESM2_ESM.pdf/9577162)
Supplement: MOESM2 [file 9577162]

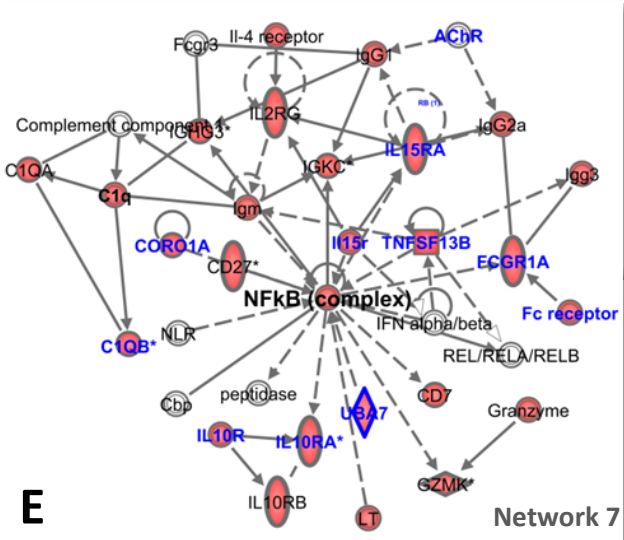

**NF-kB Network**

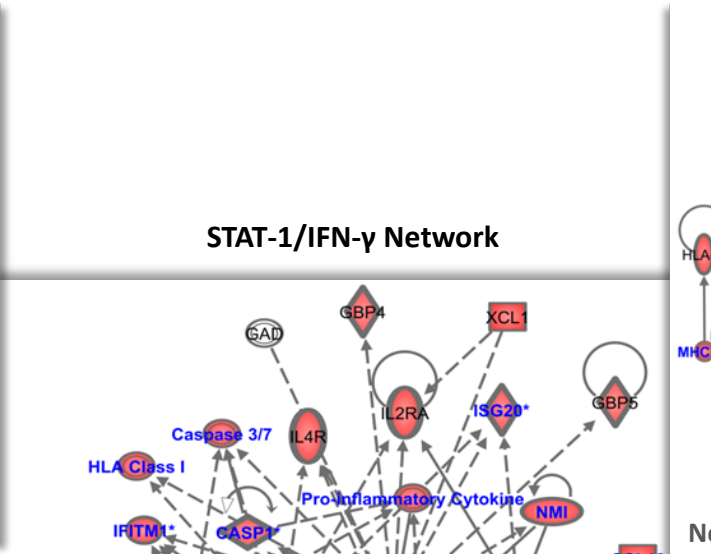

**STAT-1/IFN- $\gamma$  Network**

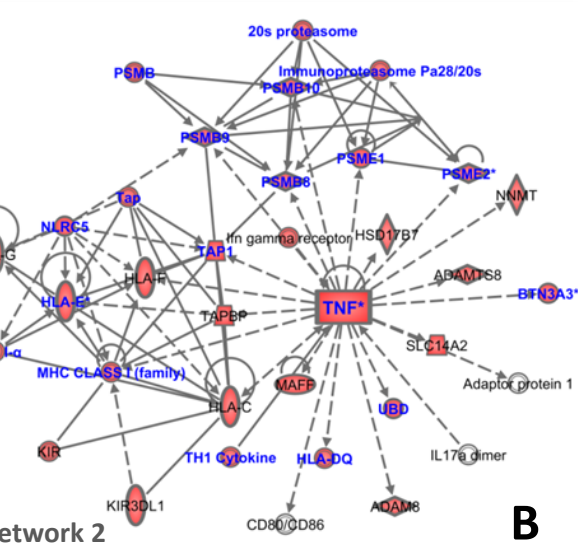

**TNF- $\alpha$  Network**

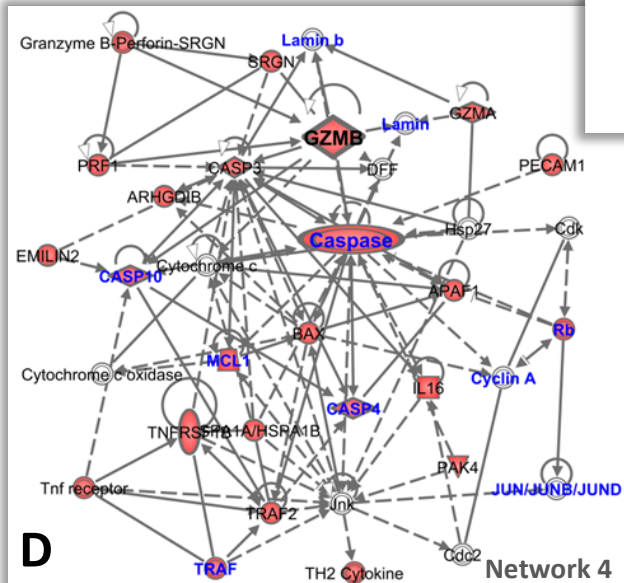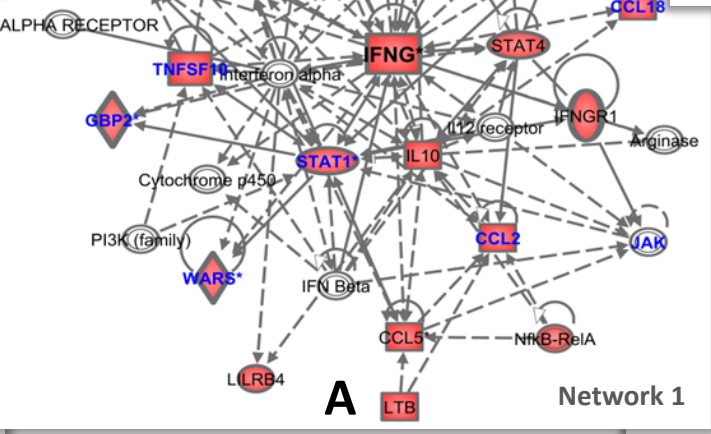

Blue genes = IFN- $\gamma$  Overlay

Immune Effector Function Genes - Network

Chemokine/Chemokine Receptor Network

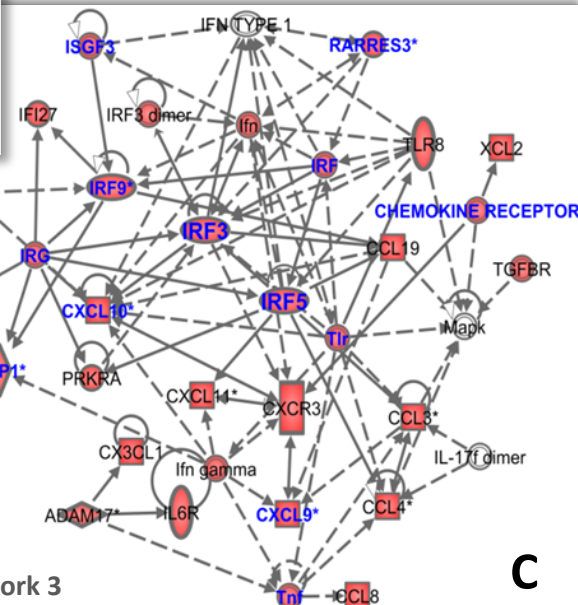

**Network 3**

**C**
